# Supplementary material
Source: Springer Nature journal article supplement (https://www.springermedizin.de/resource/supplementary/12889_2012_4265_MOESM5_ESM.pdf/9491512)

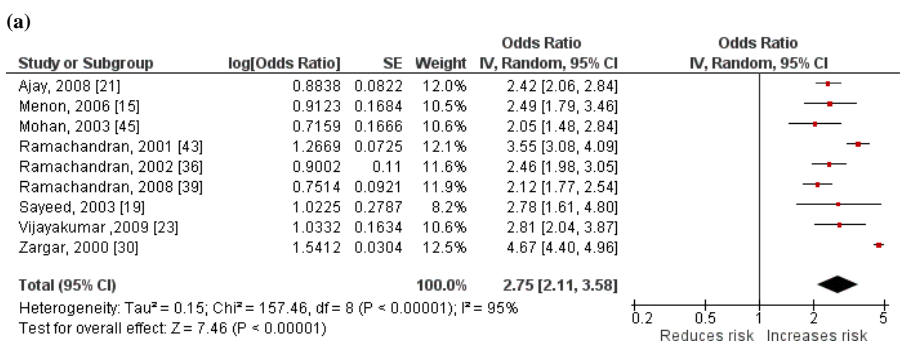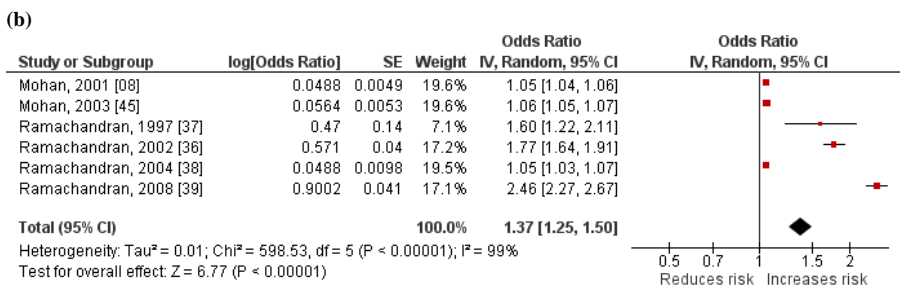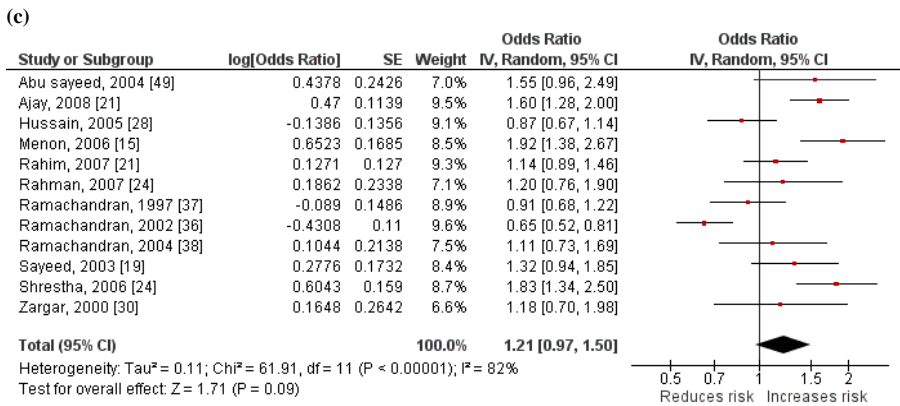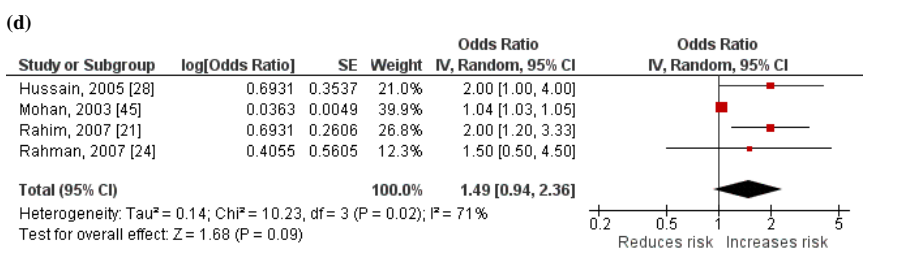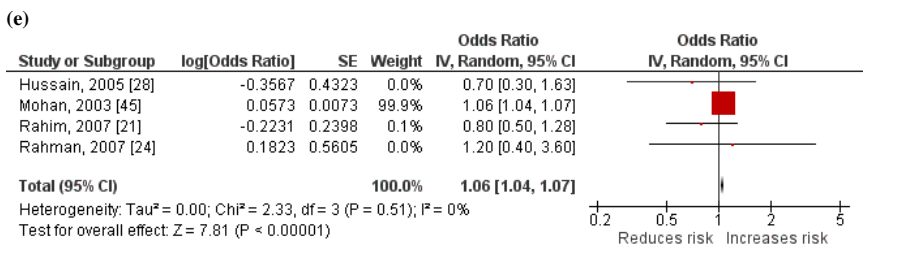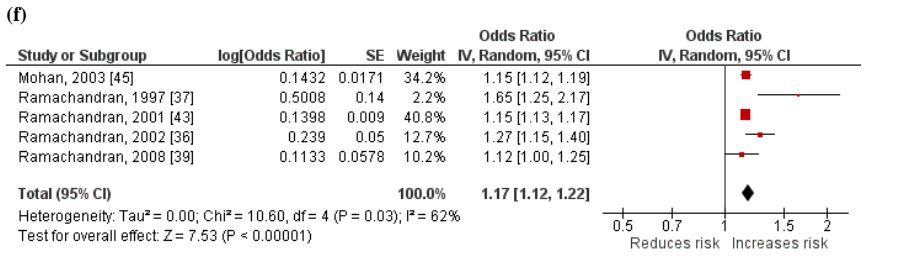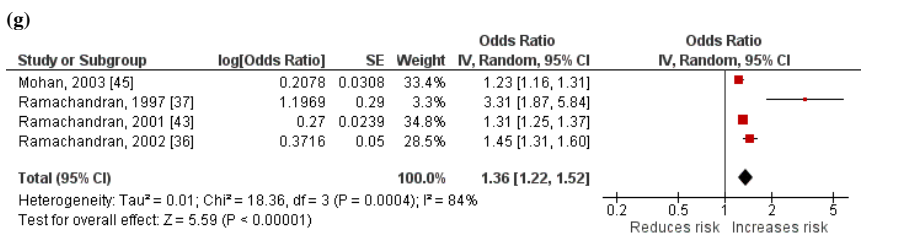

Supplement: MOESM5 [file 9491512]
